# Supplementary material for: In Vivo Treatment with Insulin-like Growth Factor 1 Reduces CCR5 Expression on Vaccine-Induced Activated CD4+ T-Cells
Source: MDPI journal article supplement (doi:10.3390/vaccines11111662), 2023-10-30
Supplement: s1 [file s1]

## ***In vivo* treatment with insulin-like growth factor reduces CCR5 expression on vaccine-induced activated CD4<sup>+</sup> T-cells**

Massimiliano Bissa <sup>1,\*</sup>, Veronica Galli <sup>1</sup>, Luca Schifanella <sup>1</sup>, Monica Vaccari <sup>1,2</sup>, Mohammad Arif Rahman <sup>1</sup>, Giacomo Gorini <sup>1</sup>, Nicolo Binello <sup>1</sup>, Sarkis Sarkis <sup>1</sup>, Anna Gutowska <sup>1</sup>, Isabela Silva de Castro <sup>1</sup>, Melvin N. Doster <sup>1</sup>, Ramona Moles <sup>1</sup>, Guido Ferrari <sup>3</sup>, Xiaoying Shen <sup>3</sup>, David C. Montefiori <sup>3</sup>, Kombo F. N'guessan <sup>4,5</sup>, Dominic Paquin-Proulx <sup>4,5</sup>, Pamela A. Kozlowski <sup>8</sup>, David J. Venzon <sup>7</sup>, Hyoyoung Choo-Wosoba <sup>7</sup>, Matthew W. Breed <sup>8</sup>, Joshua Kramer <sup>8</sup>, Genoveffa Franchini <sup>1,\*</sup>

### **Supplementary Material**

**Figure S1.** IGF-1 effect on antibody responses to gp120 proteins and V1/V2 scaffolds. (a-c) Specific activity to gp70 SIV V1/V2 of (a) mac239cs, 23, (b) mac251WY30, and (c) smE660-BR-CG7V in rectal secretions of vaccinated (n=13) and vaccinated+IGF-1 (n=12) animals at week 14. (d) Specific activity to gp70 SIV V1/V2 of smE660-BR-CG7V in vaginal secretions of vaccinated (n=13) and vaccinated+IGF-1 (n=12) animals at week 14. Comparisons: two-tailed Mann-Whitney U test with mean and SD. Statistical significance: \*P<0.05; \*\*P<0.01; \*\*\*P<0.001; \*\*\*\*P<0.0001.

**Figure S2.** IGF-1 effect on ADCC and NK function. (a, b) Normalized ADCC killing in plasma of vaccinated (n=13) and vaccinated+IGF-1 (n=12) animals at week 14 against target cells coated with (a) SIV<sub>mac251</sub> V1 deleted gp120 or (b) wild-type proteins. (c) Frequencies of non-classical monocytes in blood of vaccinated (n=13) and vaccinated+IGF-1 (n=12) animals at week 13. (d, e) Frequencies of NKG2A<sup>+</sup> NK cells expressing Granzyme B, Perforin, INF-γ or TNF-α in (d) unstimulated or (e) PMA+I stimulated PBMCs, with or without IGF-1, collected from vaccinated (n=8) animals following last immunization (week 14). Comparisons: two-tailed Wilcoxon signed rank test between gp120 and gp120+IGF-1 treated cells for secreted protein (unadjusted p values) with mean and SD. (f) Correlation between the Specific ADCC killing of SIV infected cells in plasma of vaccinated animals (n=13) at week 14 and the trogocytosis score in plasma at week 14. (g) Frequencies of CD14<sup>+</sup> efferocytes following *in vitro* 24 hours incubation without (NS) or with IGF-1 stimulation (IGF-1) in CD14<sup>+</sup> cells isolated from naïve macaques (n=9). Comparisons: (a-c) two-tailed Mann-Whitney U test with mean and SD; (g) two-tailed Wilcoxon signed rank test with mean and SD; (f) two-tailed Spearman correlation with simple linear regression. Statistical significance: \*P<0.05; \*\*P<0.01; \*\*\*P<0.001; \*\*\*\*P<0.0001.

**Table S1.** Plasma IgA, IgG1, IgG2, IgG3, IgG4, and the sum of IgGs response to SIV<sub>mac251</sub> gp120. The data represented show the median, the 25<sup>th</sup> and 75<sup>th</sup> percentiles, and the 95% Confidence Intervals (CI) of the µg/ml of IgA and IgGs measured in plasma of vaccinated (n=13) and vaccinated+IGF-1 (n=12) animals at week 14. The last column shows the unadjusted p-values of the comparisons between the two groups using two-tailed Mann-Whitney U test.

**Table S2.** Serum neutralizing antibody responses to SIV viruses. The data represented show the median, the 25<sup>th</sup> and 75<sup>th</sup> percentiles, and the 95% Confidence Intervals (CI) of ID<sub>50</sub> and ID<sub>80</sub> neutralizing antibody responses to different SIV viruses (tier 1A/SIV<sub>mac251</sub>, tier 1A/SIV<sub>smE660</sub>, tier 1B/SIV<sub>smE660</sub> and SIV<sub>mac251</sub> used for the animal challenge) in serum of vaccinated (n=13) and

vaccinated+IGF-1 (n=12) animals at week 14. The last column shows the unadjusted p-values of the comparisons between the two groups using two-tailed Mann-Whitney U test. Rows highlighted in red or blue indicate a higher response in vaccine or vaccine+IGF-1 animals, respectively.

**Table S3.** Variable regions 1 and 2 overlapping peptides. Amino acid sequence (single letter aa code) of 15 overlapping peptides (20-mers) encompassing the V1 (peptides 15-24) and V2 (peptides 25-29) of SIV<sub>M766-mac251</sub>.

**Table S4.** Binding Antibody Multiplex assay (BAMA) in vaccinated and vaccinated+IGF-1 animals. The data represented show the median, the 25<sup>th</sup> and 75<sup>th</sup> percentiles, the 95% confidence intervals (CI) of each antibody response to SIV proteins (p55, gp41, gp120 of SIV<sub>mac239</sub>, gp140 of SIV<sub>smE660</sub>, and gp130 of SIV<sub>mac251</sub>) and SIV gp70-V1/V2 scaffolds (SIV<sub>mac239cs</sub>, 23, SIV<sub>mac251WY30</sub> and SIV<sub>smE660-BR-CG7V</sub>), measured by BAMA in plasma, rectal and vaginal secretions of vaccinated and vaccinated+IGF-1 animals at 2 weeks following the last immunization (week 14). The N of animals used in each analysis is reported. The last column shows the unadjusted p-values of the comparisons between the two groups using the two-tailed Mann-Whitney U test. Rows highlighted in blue indicate higher response in vaccinated+IGF-1 animals.

a

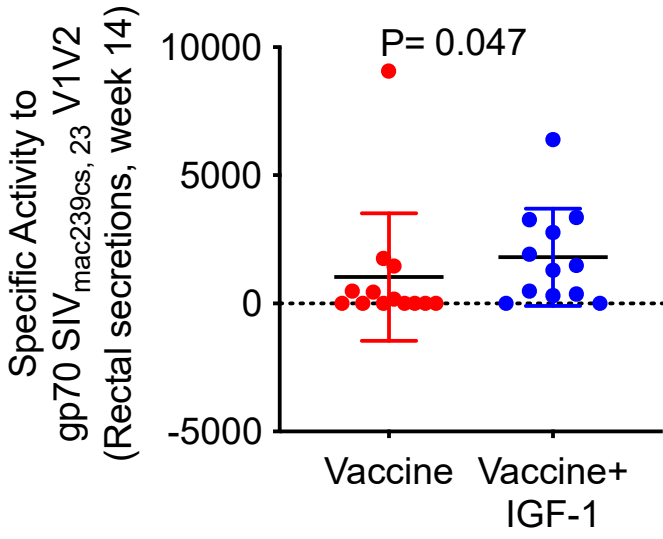

b

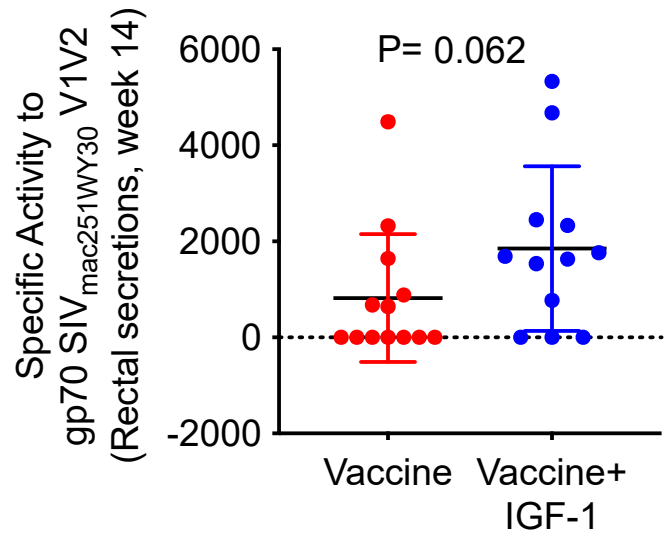

c

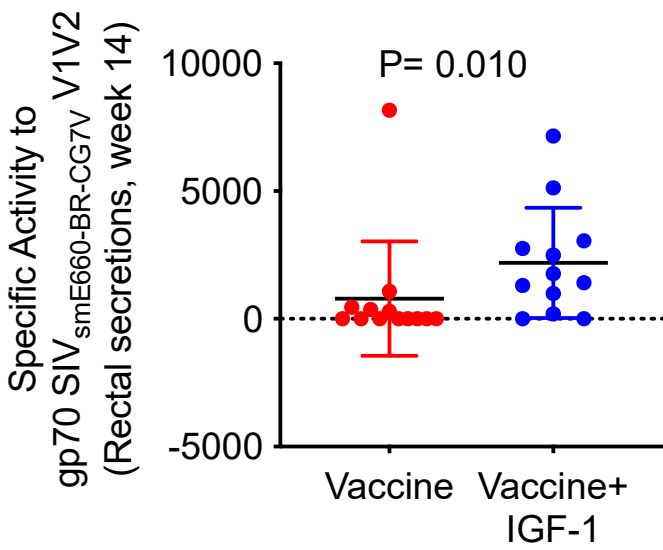

d

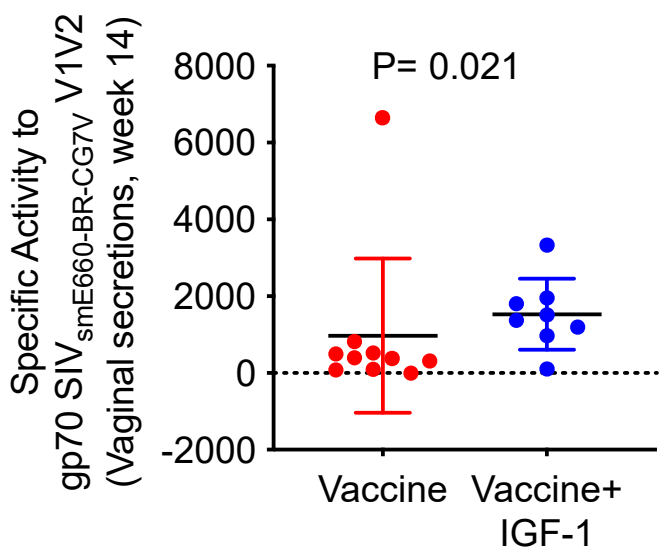

Figure S1

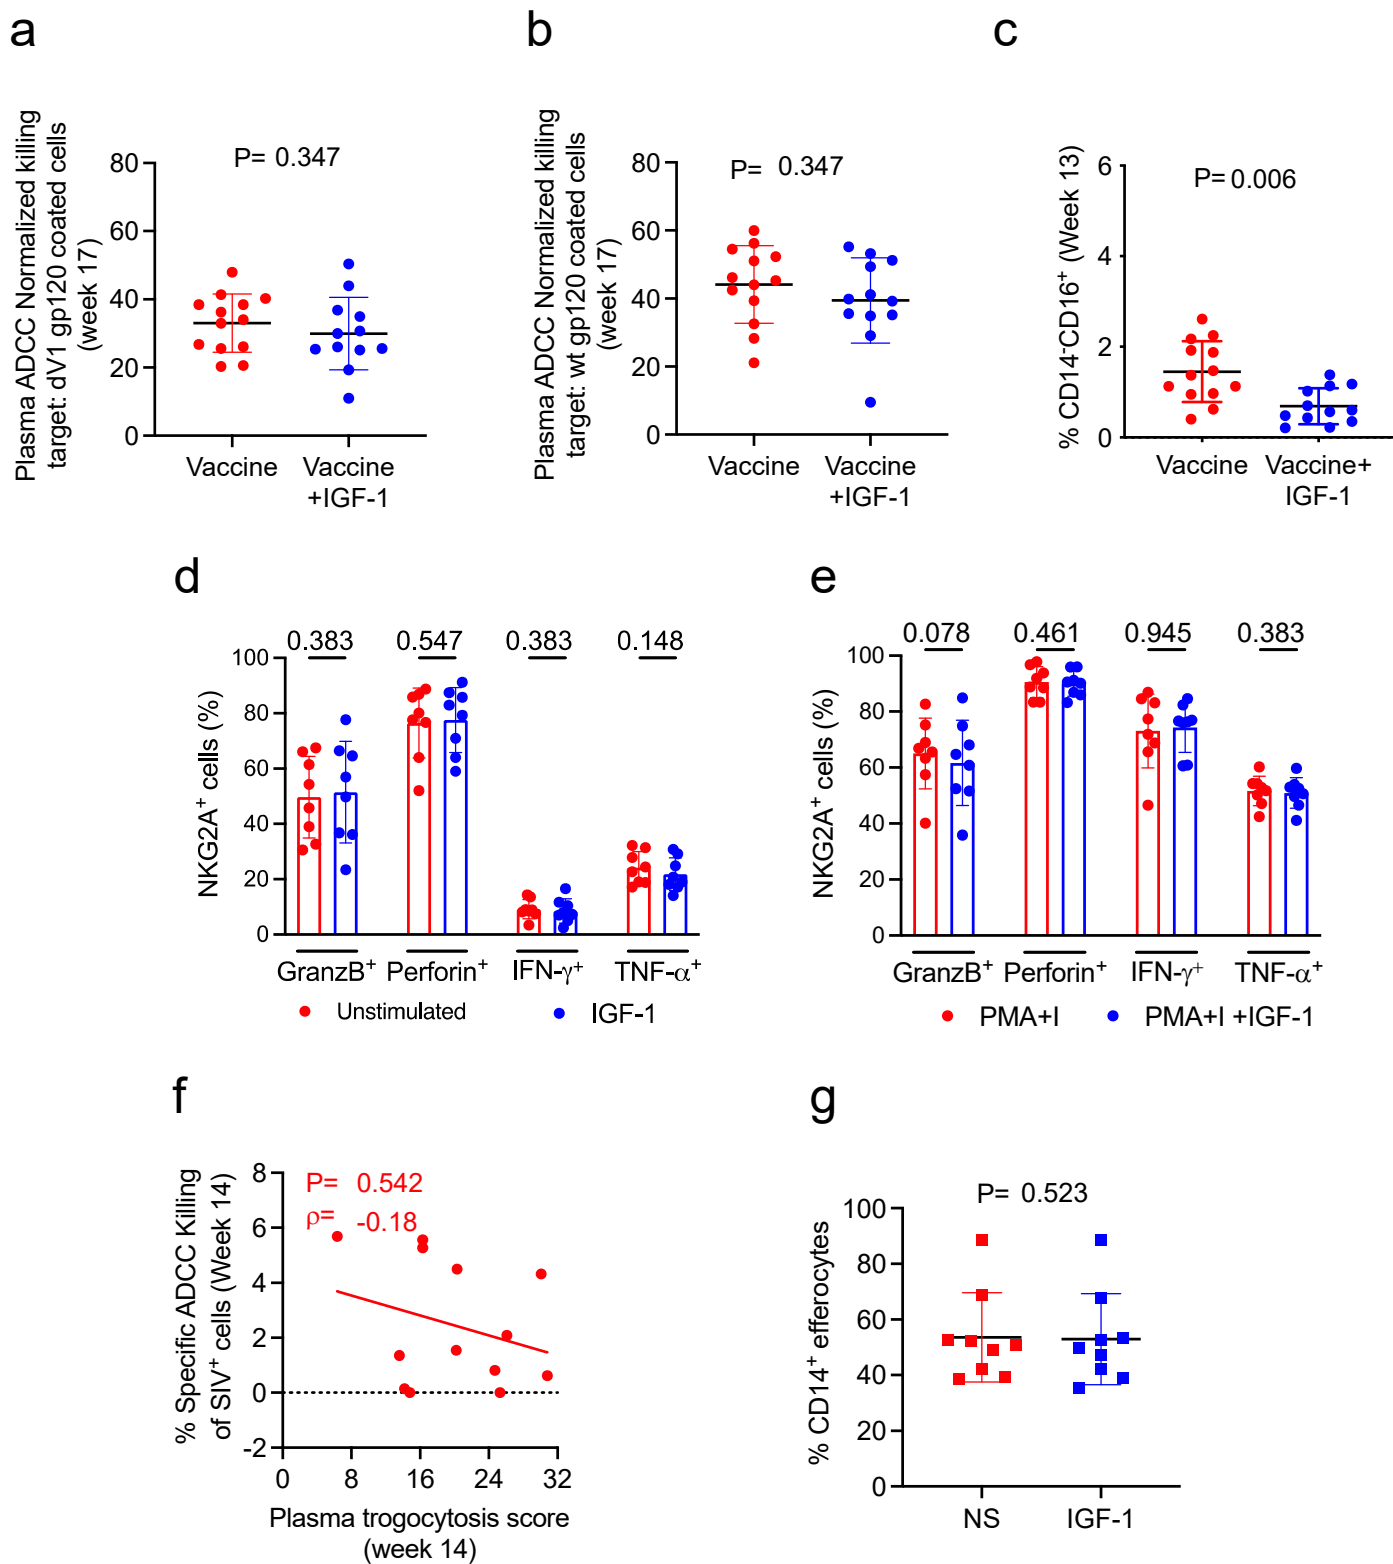

**Figure S2**

Table S1

|          | Vaccine        |        |                |             |           |
|----------|----------------|--------|----------------|-------------|-----------|
|          | 25% Percentile | Median | 75% Percentile | 95% CI      | N animals |
| IgA      | 0.82           | 2.62   | 4.8            | 0.75-5.86   | 13        |
| IgG1     | 186.4          | 205.8  | 308.2          | 181.5-330.9 | 13        |
| IgG2     | 3.05           | 9.2    | 17.4           | 1.3-17.9    | 13        |
| IgG3     | 0.03           | 0.03   | 0.03           | 0.03-0.03   | 13        |
| IgG4     | 0.04           | 0.04   | 0.065          | 0.04-0.07   | 13        |
| Sum IgGs | 197.9          | 212.2  | 319.7          | 194.5-348.9 | 13        |

| Vaccine+IGF-1  |        |                |             |           |
|----------------|--------|----------------|-------------|-----------|
| 25% Percentile | Median | 75% Percentile | 95% CI      | N animals |
| 0.7425         | 1.145  | 1.743          | 0.74-1.81   | 12        |
| 202.8          | 238    | 375.6          | 201.5-379   | 12        |
| 1.225          | 6.35   | 46.63          | 1.1-51      | 12        |
| 0.03           | 0.03   | 0.03           | 0.03-0.03   | 12        |
| 0.04           | 0.04   | 0.075          | 0.04-0.08   | 12        |
| 209.1          | 280.4  | 376.9          | 208.8-380.6 | 12        |

| Vaccine vs Vaccine+IGF-1  |
|---------------------------|
| Mann-Whitney Test P-value |
| 0.0699                    |
| 0.4059                    |
| 0.9245                    |
| >0.9999                   |
| 0.8130                    |
| 0.3980                    |

Table S2

|                     |                                                   | Vaccine        |        |                |              | Vaccine+IGF-1  |        |                |             | Vaccine vs Vaccine+IGF-1  |
|---------------------|---------------------------------------------------|----------------|--------|----------------|--------------|----------------|--------|----------------|-------------|---------------------------|
|                     |                                                   | 25% Percentile | Median | 75% Percentile | 95% CI       | 25% Percentile | Median | 75% Percentile | 95% CI      | Mann-Whitney Test P-value |
| Neutralization ID50 | TIER 1A SIVmac251.6 (ID#1636DB2)                  | 65296          | 88146  | 166015         | 65121-171251 | 45649          | 63065  | 80256          | 43355-81232 | 0.0257                    |
|                     | TIER 1A SIVsmE660/BR-CG7G.IR1 (ID#1370DB2)        | 5427           | 26438  | 95260          | 5318-116559  | 11495          | 21722  | 50420          | 11144-53496 | 0.8517                    |
|                     | TIER 1B SIVsmE660/BR-CG7V.IR1 (ID#1634DB2)        | 0              | 880    | 5639           | 0-6480       | 0              | 127.5  | 1017           | 0-1117      | 0.2583                    |
|                     | Challenge virus SIVmac251 DAY 8 2010 (ID#2079DB2) | 46.5           | 63     | 112            | 46-119       | 35.5           | 47.5   | 61.25          | 34-63       | 0.1004                    |
|                     |                                                   |                |        |                |              |                |        |                |             |                           |
| Neutralization ID80 | TIER 1A SIVmac251.6 (ID#1636DB2)                  | 0              | 1352   | 5673           | 0-5816       | 59.25          | 2398   | 4474           | 45-4503     | 0.4910                    |
|                     | TIER 1A SIVsmE660/BR-CG7G.IR1 (ID#1370DB2)        | 755.5          | 5847   | 22169          | 523-22477    | 4158           | 6128   | 8694           | 4147-9087   | >0.9999                   |
|                     | TIER 1B SIVsmE660/BR-CG7V.IR1 (ID#1634DB2)        | 0              | 0      | 0              | 0-0          | 0              | 0      | 0              | 0-0         | >0.9999                   |
|                     | Challenge virus SIVmac251 DAY 8 2010 (ID#2079DB2) | 0              | 0      | 0              | 0-0          | 0              | 0      | 0              | 0-0         | >0.9999                   |

Table S3

| Peptide | Amino acid sequence  |
|---------|----------------------|
| 15      | PCVKLSPLCITMRCNKSETD |
| 16      | PLCITMRCNKSETDRWGLTK |
| 17      | RCNKSETDRWGLTKSSTTIT |
| 18      | TDRWGLTKSSTTITTAAPTS |
| 19      | TKSSTTITTAAPTSAPVSEK |
| 20      | ITTAAPTSAPVSEKIDMVNE |
| 21      | TSAPVSEKIDMVNETSSCIA |
| 22      | EKIDMVNETSSCIAQNNCTG |
| 23      | NETSSCIAQNNCTGLEQEQM |
| 24      | IAQNNCTGLEQEQMISCKFT |
| 25      | TGLEQEQMISCKFTMTGLKR |
| 26      | QMISCKFTMTGLKRDKTKEY |
| 27      | FTMTGLKRDKTKEYNETWYS |
| 28      | KRDKTKEYNETWYSTDLVCE |
| 29      | EYNETWYSTDLVCEQGNSTD |

Table S4

|                       |                                                   | Vaccine           |        |                   |            |           | Vaccine+IGF-1     |        |                   |            |           | Vaccine vs Vaccine+IGF-1  |
|-----------------------|---------------------------------------------------|-------------------|--------|-------------------|------------|-----------|-------------------|--------|-------------------|------------|-----------|---------------------------|
|                       |                                                   | 25%<br>Percentile | Median | 75%<br>Percentile | 95% CI     | N animals | 25%<br>Percentile | Median | 75%<br>Percentile | 95% CI     | N animals | Mann-Whitney Test P-value |
| Plasma                | MFI SIV p55                                       | 4131              | 14383  | 24772             | 4122-24964 | 12        | 4834              | 13995  | 27328             | 4085-28489 | 12        | 0.887                     |
|                       | MFI SIV gp41                                      | 122               | 167.5  | 452.3             | 113-465    | 10        | 35.5              | 215.5  | 371.3             | 0-376      | 12        | 0.733                     |
|                       | MFI SIV gp120 mac239                              | 3807              | 4502   | 8907              | 3770-9334  | 12        | 2222              | 7821   | 10242             | 2151-10384 | 12        | 0.671                     |
|                       | MFI gp140 (SIVsmE660)                             | 4407              | 5485   | 13872             | 4305-16191 | 12        | 6647              | 9980   | 14502             | 6638-14657 | 12        | 0.291                     |
|                       | MFI gp130 SIVmac251                               | 5542              | 8859   | 14836             | 5318-16159 | 12        | 8909              | 15088  | 16134             | 8223-16342 | 12        | 0.198                     |
|                       | MFI gp70-SIVmac239cs, 23, V1V2                    | 1186              | 3511   | 21579             | 830-21987  | 11        | 4879              | 12805  | 22091             | 3755-23352 | 12        | 0.190                     |
|                       | MFI gp70-SIVmac251WY30, V1V2                      | 1223              | 5125   | 11731             | 687-20871  | 11        | 8697              | 13122  | 21780             | 8562-23437 | 12        | 0.104                     |
|                       | MFI gp70-SIVSME660-BR-CG7V, V1V2                  | 1037              | 4631   | 7496              | 931-20893  | 11        | 5919              | 14453  | 23776             | 5567-24616 | 12        | 0.079                     |
|                       |                                                   |                   |        |                   |            |           |                   |        |                   |            |           |                           |
| Rectal<br>secretions  | Specific activity to SIV p55                      | 0                 | 490    | 1307              | 0-1559     | 13        | 194.8             | 856.5  | 2347              | 185-2688   | 12        | 0.279                     |
|                       | Specific activity to SIV gp41                     | 0                 | 0      | 0                 | 0-0        | 13        | 0                 | 0      | 0                 | 0-0        | 12        | >0.999                    |
|                       | Specific activity to SIV gp120 mac239             | 267               | 845    | 2182              | 0-2423     | 13        | 579.8             | 1495   | 2125              | 579-2283   | 12        | 0.538                     |
|                       | Specific activity to gp140 (SIVsmE660)            | 0                 | 710    | 1731              | 0-1792     | 13        | 91.25             | 917.5  | 1803              | 0-1980     | 12        | 0.766                     |
|                       | Specific activity to gp130 SIVmac251              | 1279              | 1696   | 4114              | 1241-4195  | 13        | 2024              | 3303   | 3974              | 1929-4055  | 12        | 0.650                     |
|                       | Specific activity to gp70-SIVmac239cs, 23, V1V2   | 0                 | 0      | 967               | 0-1459     | 13        | 322.5             | 1387   | 3147              | 307-3273   | 12        | 0.047                     |
|                       | Specific activity to gp70-SIVmac251WY30, V1V2     | 0                 | 0      | 1262              | 0-1640     | 13        | 192.5             | 1660   | 2420              | 0-2450     | 12        | 0.062                     |
|                       | Specific activity to gp70-SIVsmE660-BR-CG7V, V1V2 | 0                 | 0      | 411               | 0-453      | 13        | 389               | 1589   | 2976              | 189-3050   | 12        | 0.010                     |
|                       |                                                   |                   |        |                   |            |           |                   |        |                   |            |           |                           |
| Vaginal<br>Secretions | Specific activity to SIV p55                      | 334.8             | 1086   | 1508              | 148-1534   | 10        | 179.8             | 358    | 1005              | 122-4595   | 8         | 0.408                     |
|                       | Specific activity to SIV gp41                     | 0                 | 0      | 0                 | 0-0        | 10        | 0                 | 0      | 0                 | 0-54       | 8         | 0.739                     |
|                       | Specific activity to SIV gp120 mac239             | 470.5             | 976.5  | 1544              | 277-2115   | 10        | 505.3             | 1223   | 2113              | 227-2489   | 8         | 0.762                     |
|                       | Specific activity to gp140 (SIVsmE660)            | 253               | 910    | 2395              | 76-2574    | 10        | 512               | 1148   | 2239              | 125-4706   | 8         | 0.696                     |
|                       | Specific activity to gp130 SIVmac251              | 823.8             | 1902   | 2891              | 394-3124   | 10        | 1153              | 1604   | 2684              | 0-3969     | 8         | 0.897                     |
|                       | Specific activity to gp70-SIVmac239cs, 23, V1V2   | 80.5              | 369.5  | 1433              | 70-3876    | 10        | 448.3             | 1514   | 3200              | 96-3701    | 8         | 0.203                     |
|                       | Specific activity to gp70-SIVmac251WY30, V1V2     | 50.5              | 590    | 1911              | 22-3502    | 10        | 943.3             | 1302   | 2397              | 127-3333   | 8         | 0.237                     |
|                       | Specific activity to gp70-SIVsmE660-BR-CG7V, V1V2 | 90.75             | 385    | 592               | 78-817     | 10        | 1026              | 1443   | 1920              | 107-3331   | 8         | 0.021                     |
